# Supplementary material for: Computational investigation of the influence of tetrahedral oxoanions (sulphate, selenate and chromate) on the stability of calcium carbonate polymorphs
Source: Royal Society of Chemistry journal article supplement (doi:10.1039/c5ra08574h), 2015-01-01
Supplement: c5ra08574h1.pdf [file c5ra08574h1.pdf]

## Supplementary Information

**Table S.I.1.-** k-points utilized in the DFT calculations of  $\text{Ca}(\text{CO}_3)_{1-x}(\text{AO}_4)_x\text{O}_3$  polymorphs.

| Concentration, x | Aragonite | Calcite   | Vaterite $P6_3/mmc$ | vaterite $Ama2$ |
|------------------|-----------|-----------|---------------------|-----------------|
| 0                | 6 x 4 x 6 | 6 x 6 x 6 | 6 x 6 x 6           | 4 x 4 x 6       |
| 0.25             | 4 x 4 x 4 | --        | 4 x 6 x 4           | --              |
| 0.167            | --        | 4 x 4 x 2 | --                  | --              |
| 0.125            | 2 x 4 x 4 | --        | --                  | 4 x 4 x 4       |
| 0.083            | --        | 4 x 4 x 2 | 2 x 4 x 4           | --              |
| 0.063            | 4 x 2 x 4 | --        | --                  | 4 x 2 x 4       |
| 0.056            | --        | --        | 2 x 2 x 2           | --              |
| 0.042            | --        | 2 x 2 x 1 | --                  | --              |
| 0.031            | 2 x 2 x 2 | --        | --                  | 4 x 2 x 2       |
| 0.028            | --        | --        | 2 x 2 x 2           | --              |
| 0.021            | 2 x 2 x 2 | 2 x 2 x 1 | --                  | 2 x 2 x 2       |

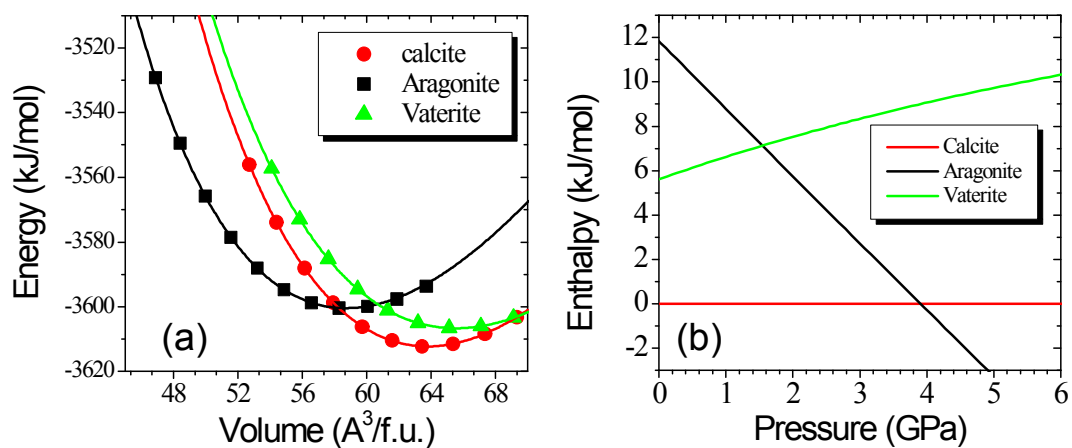

**Figure S.I.1.-** (a) Calculated total energy vs volume curves of the  $\text{CaCO}_3$  polymorphs; calcite (red) Aragonite (black) and vaterite (green). Symbols correspond to the DFT calculated data, and lines show the fitting to the Murnaghan equation of state. (b) Calculated enthalpy vs. pressure for the  $\text{CaCO}_3$  polymorphs.

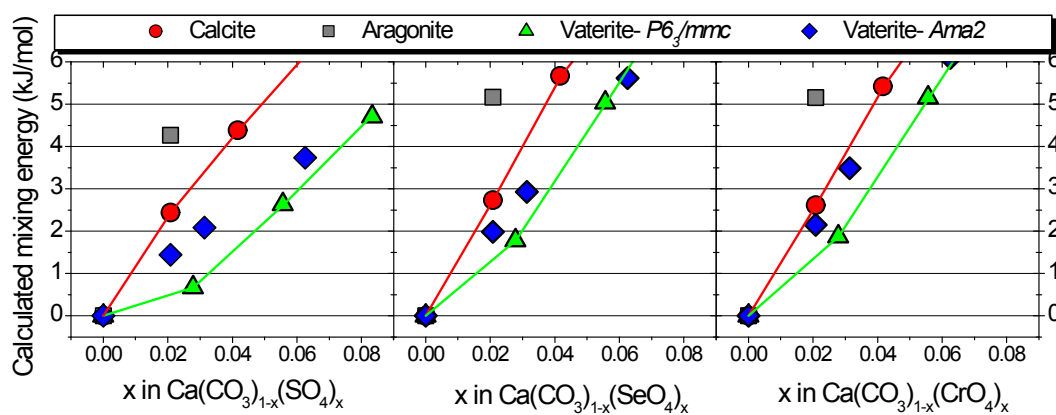

**Figure S.I.2.-** Same as **Figure 3** in main text: Calculated mixing energies of  $\text{Ca}(\text{CO}_3)_{1-x}(\text{AO}_4)_x$  in the crystal structures of calcite (red circles) aragonite (grey squares) and Vaterite-P63/cmm (green triangles) and vaterite-Ama2 (blue diamonds). Lines are guide to the eye.

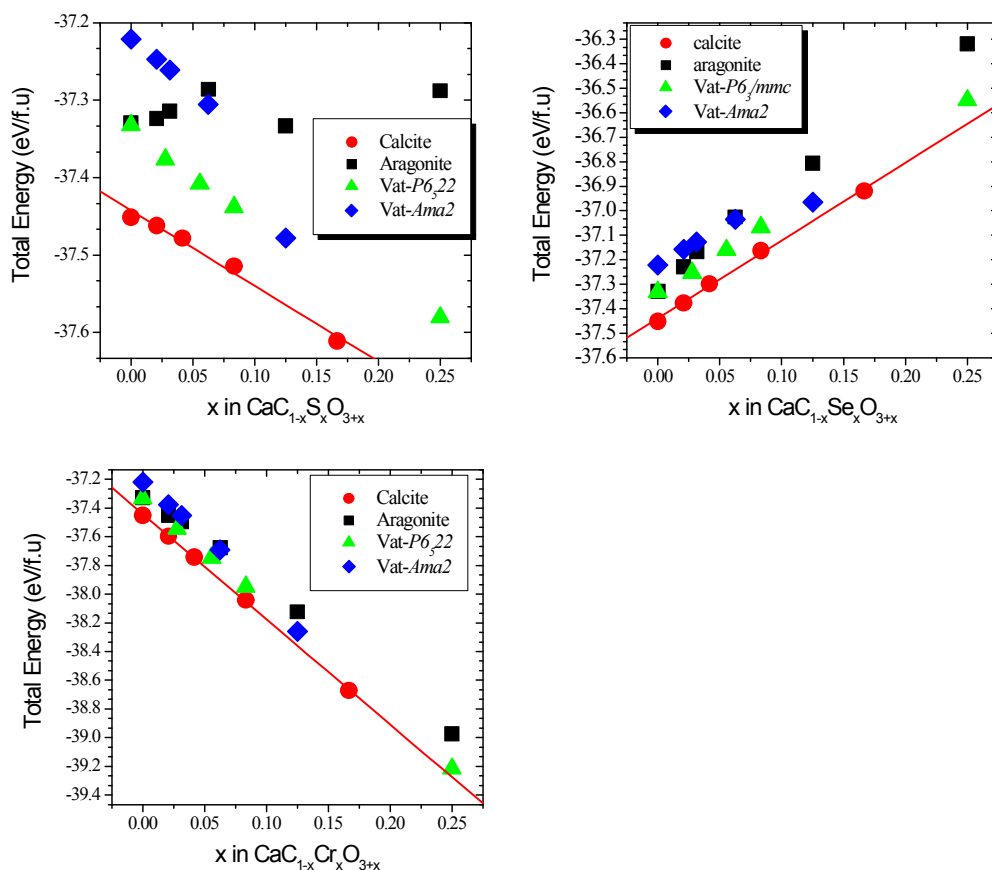

**Figure S.I.3.-** Calculated total energy vs concentration of the  $\text{Ca}(\text{CO}_3)_{1-x}(\text{AO}_4)_x\text{O}_3$  polymorphs; calcite (red circles), aragonite (black squares), vaterite  $P6_3/mmc$  (green triangles) and vaterite *Ama2* (blue diamonds). **Figure 4** in main text is constructed taking the energy difference between the calculated DFT data and the linear fitting of the calcite energy,  $E_{\text{calcite}} = a + bx$  (red lines) where the parameters,  $a$  and  $b$ , are estimated by the method of least squares. Correlation factors of the linear fittings are  $R_S = 0.993$ ,  $R_{\text{Se}} = 0.999$ ,  $R_{\text{Cr}} = 1$
